# Supplementary material for: National and subnational all-cause and cause-specific child mortality in China, 1996–2015: a systematic analysis with implications for the Sustainable Development Goals
Source: PubMed Central journal article supplement (PMC5250590; doi:10.1016/s2214-109x(16)30334-5), 2016-12-20
Supplement: mmc1.pdf [file mmc1.pdf]

# THE LANCET Global Health

## Supplementary appendix

This appendix formed part of the original submission and has been peer reviewed. We post it as supplied by the authors.

Supplement to: He C, Liu L, Chu Y, et al. National and subnational all-cause and cause-specific child mortality in China, 1996–2015: a systematic analysis with implications for the Sustainable Development Goals. *Lancet Glob Health* 2016; published online Dec 19. [http://dx.doi.org/10.1016/S2214-109X\(16\)30334-5](http://dx.doi.org/10.1016/S2214-109X(16)30334-5).

## **National and subnational levels and causes of child mortality in 1996-2015 in China: implications for the Sustainable Development Goals**

Chunhua He, MD<sup>1\*</sup>, Li Liu, PhD<sup>2,3\*‡</sup>, Yue Chu, MSPH<sup>3</sup>, Jamie Perin, PhD<sup>3</sup>, Li Dai, PhD<sup>1</sup>, Xiaohong Li, MD<sup>1</sup>, Lei Miao, BA<sup>1</sup>, Leni Kang, PhD<sup>1</sup>, Qi Li, MD<sup>1</sup>, Robert Scherpbier, MPH<sup>4</sup>, Sufang Guo, MD<sup>5</sup>, Prof Igor Rudan, MD<sup>6</sup>, Peige Song, MSc<sup>6</sup>, Kit Yee Chan, PhD<sup>6,7</sup>, Prof Yan Guo, MPH<sup>8</sup>, Prof Robert E Black, MD<sup>3</sup>, Prof Yanping Wang, MD<sup>1‡</sup>, Prof Jun Zhu, MD<sup>1,9‡</sup>

<sup>1</sup>National Office of Maternal and Child Health Surveillance of China, Department of Pediatrics, West China Second University Hospital, Sichuan University, Chengdu, China

<sup>2</sup>Department of Population Family and Reproductive Health, Johns Hopkins Bloomberg School of Public Health, Baltimore, USA

<sup>3</sup>The Institute for International Programs, Department of International Health, Johns Hopkins Bloomberg School of Public Health, Baltimore, USA

<sup>4</sup>UNICEF China, Beijing, China

<sup>5</sup> UNICEF Regional Office for South Asia, Kathmandu, Nepal

<sup>6</sup> Centre for Global Health Research, Usher Institute of Population Health Sciences and Informatics, University of Edinburgh, Edinburgh, Scotland, United Kingdom

<sup>7</sup>Nossal Institute for Global Health, University of Melbourne, Melbourne, Australia

<sup>8</sup>Peking University Health Science Center, Beijing, China

<sup>9</sup>Key Laboratory of Birth Defects and Related Diseases of Women and Children (Sichuan University), Ministry of Education, Chengdu, Sichuan, China

\*indicates joint first-authorship

‡indicates joint corresponding authorship

Correspondence to:

Dr. Li Liu, Department of Population, Family and Reproductive Health, and the Institute for International Programs, Department of International Health, Johns Hopkins Bloomberg School of Public Health, 615 N Wolfe Street, Baltimore, MD 21205, USA [lliu26@jhu.edu](mailto:lliu26@jhu.edu)

Prof Yanping Wang, National Office of Maternal and Child Health Surveillance, West China Second University Hospital, No.20, Section 3, Renmin South Road, Chengdu, 610041 China [wxyyanping@163.com](mailto:wxyyanping@163.com)

Prof Jun Zhu, National Office of Maternal and Child Health Surveillance, West China Second University Hospital, No.20, Section 3, Renmin South Road, Chengdu, 610041 China, [zhu\\_jun1@163.com](mailto:zhu_jun1@163.com)

## **Supplementary webappendix**

Webappendix 1. Evolution of the China Maternal and Child Health Surveillance System (MCHSS)

Webappendix 2. The sampling design of MCHSS before 2006

Webappendix 3. Additional details on sample size calculation of MCHSS

Webappendix 4. MCHSS sampling

Webappendix 5. Child Death Registration Card

Webappendix 6. The distribution of deaths by cause ascertaining method by age and year, MCHSS, China

Webappendix 7. Additional details on quality control of MCHSS

Webappendix 8. Causes of deaths categorization and mapping between MCHSS classification, ICD-10, and the CHERG classification

Webappendix 9. Sampling probability (%) by region-and-residency strata in MCHSS

Webappendix 10. Guidelines for Accurate and Transparent Health Estimates Reporting (GATHER) checklist

Webappendix 11. Cause specific mortality fractions by age among children under-five years of age in China in 2015

Webappendix 12. Cause specific mortality fractions by residency and region in China in 2015

Webappendix 13. Comparison of age-and-cause-specific mortality fractions in 2015 between He et al. (our estimates) and Song et al.

Webappendix 14. Comparison of trends in national U5MR and NMR by estimation sources, China, 1996-2015

Webappendix 1. Evolution of the China Maternal and Child Health Surveillance System (MCHSS)

| <b>Year</b>                                        | <b>1991</b>                                      | <b>1996</b>                                                                                    | <b>2001</b>                                    | <b>2006/07</b>                         | <b>2009</b>                            | <b>2013</b>              |
|----------------------------------------------------|--------------------------------------------------|------------------------------------------------------------------------------------------------|------------------------------------------------|----------------------------------------|----------------------------------------|--------------------------|
| Event                                              | Child mortality surveillance network established | Child mortality, maternal mortality, and congenital abnormality surveillance networks combined | Site update <sup>1</sup>                       | MCHSS expansion initiated <sup>2</sup> | MCHSS expansion completed <sup>2</sup> | Site update <sup>3</sup> |
| Number of sites under surveillance                 | 81                                               | 116                                                                                            | 116 (with 17 sites from 14 provinces replaced) | 123 with 13 sites updated <sup>4</sup> | 336                                    | 334                      |
| Number of urban districts under surveillance       | 25                                               | 37                                                                                             | 37 (2 sites replaced)                          | 56 (12 switched from rural sites)      | 126                                    | 124                      |
| Number of rural counties under surveillance        | 56                                               | 79                                                                                             | 79 (15 sites replaced)                         | 67 (1 switched from urban site)        | 210                                    | 210                      |
| Number of population under surveillance (millions) | 8.5                                              | 12.7                                                                                           | 14.0                                           | 16.7                                   | 44.9                                   | 47.1                     |

<sup>1</sup>To account for economic development, and changes in administrative boundaries and urban-rural classification while maintaining the total number of population under surveillance, 17 and 2 surveillance sites were re-selected in 2001 and 2009, respectively.

<sup>2</sup>Expansion in surveillance sites was not reflected in the data until 2009.

<sup>3</sup>Total number of sites changed from 336 to 334 due to site combination. Population under surveillance did not change.

<sup>4</sup>The changes in urban/rural classification for 13 sites were due to administrative changes for these areas based on administrative area codes published by National Bureau of Statistics of China in 2007. Before 2009, the unit of surveillance was municipalities/cities/counties. After 2009, it changed to districts/counties.

## Webappendix 2. The sampling design of MCHSS before 2006

In 1991, child mortality surveillance sites were selected using a multi-stage sampling.<sup>1,2</sup> First, all provinces in China were stratified into three regions, namely,

- Coastal Region, including Beijing, Tianjin, Shanghai, Liaoning, Shandong, Jiangsu, Zhejiang, Fujian, and Guangdong;
- Inland Region, including Jilin, Hebei, Henan, Shanxi, Anhui, Hubei, Hunan, Guangxi, Shaanxi, Jiangxi, Hainan, Heilongjiang, and Eastern Sichuan; and
- Remote Region, including Neimenggu, Ningxia, Gansu, Xinjiang, Qinghai, Yunnan, Guizhou, Xizang, and Western Sichuan.

The stratification was based on geographic location, economic status and infant mortality. All urban districts and rural counties within each region were further stratified into six strata, namely 1) large city, 2) medium/small city, 3) rural county type I, 4) rural county type II, 5) rural county type III, and 6) rural county type IV, based on health and social-economic status of the 1982 national census. Seventeen strata were established as there were no type IV rural counties in the Coastal Region.

Population under surveillance within each stratum was calculated based on stratum-specific infant mortality and crude birth rates as detailed in Webappendix 3. Prefectural-level cities and rural counties were sampled according to the following criteria to obtain representative sample within each stratum: 1) the number of cities/counties sampled with probability proportional to the number of cities/counties in each stratum, and a minimum of two cities/counties; 2) sampled cities/counties were distributed evenly across all 30 provinces considering feasibility; 3) weighted mean infant mortality of study sample was close to that of study population within each stratum; and 4) selected cities/counties had adequate human and financial resources and capability to manage and maintain surveillance sites. The resulting number of surveillance cities and counties by stratum in 1991 are shown in the table below. The total population selected exceeded the minimum sample size needed, only one district within each sampled city and two to five townships within each sampled county were sampled by systematic sampling at the end.<sup>1</sup> Within each stratum, the weighted infant mortality was close to the empirical stratum-specific infant mortality and the sample was considered nationally representative.<sup>1</sup>

Table. Number of surveillance cities/counties by stratum in 1991<sup>1</sup>

|                                                | Large city | Small city | County I | County II | County III | County IV | Total |
|------------------------------------------------|------------|------------|----------|-----------|------------|-----------|-------|
| Coastal Region                                 | 5          | 5          | 6        | 3         | 3          |           | 22    |
| Inland Region                                  | 2          | 9          | 6        | 10        | 9          | 2         | 38    |
| Remote Region                                  | 2          | 2          | 2        | 4         | 8          | 3         | 21    |
| Total                                          | 9          | 16         | 14       | 17        | 20         | 5         | 81    |
| Average population per city/county (thousands) | 150-300    | 80-150     | 55       | 50        | 40         | 30        |       |

The total surveillance sites increased from 81 cities/counties in 1991 to 116 sites representing 123 cities/counties in 1996, with one to two cities/counties added in each province/autonomous region/municipality. In 1996-2009, the unit of surveillance was municipalities/cities in urban areas and counties in rural areas. In 2001, 17 sites from 14 provinces were replaced with new ones of similar economic status, geographic characteristics and population size from the same stratum due to administrative changes and practical considerations. Since 2009, the unit of surveillance in urban areas has changed to districts while that in rural areas remained at the county level.

### Webappendix 3. Additional details on sample size calculation of MCHSS

In 1991, the desired sample size was calculated using the following formula:

$$N = \frac{\left(\frac{Z}{d}\right)^2 * r * (1 - r)}{b}$$

where  $Z$  is the  $Z$  value, which is approximately 1.96.  $d$  is the desired margin of error, which was set at 2.5%.  $r$  is the estimated infant mortality.  $b$  is the estimated crude birth rate. Both infant mortality and birth rate estimates were adopted from the 1982 national census.

Since 1996, design effect has been taken into consideration when calculating the desired sample size for each stratum, that is

$$N = \frac{\left(\frac{Z}{d}\right)^2 * r * (1 - r)}{b} * deff$$

where  $deff$  is the design effect, which was assumed to be 2.0. Infant mortality and crude birth rates were based on National Bureau of Statistics estimates. A similar formula was used for sample size calculation when MCHSS expanded in 2006, with different sources of input data as explained in the main text.

## Webappendix 4. MCHSS sampling

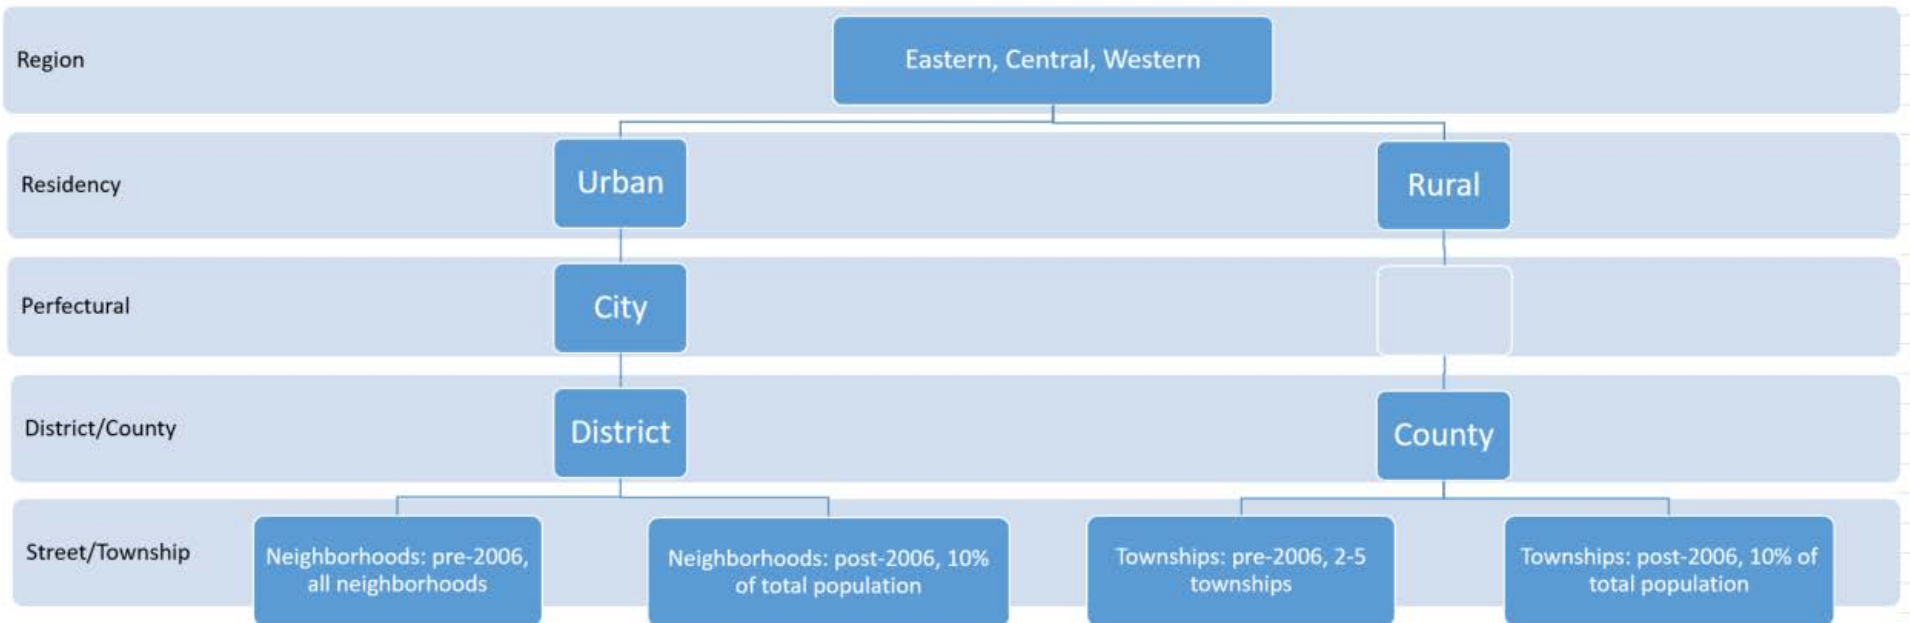



### Child Death Registration Card

\_\_\_\_\_ District/County

| <p>No. <input type="checkbox"/><input type="checkbox"/><input type="checkbox"/><input type="checkbox"/><input type="checkbox"/><input type="checkbox"/><input type="checkbox"/><input type="checkbox"/></p> <p>Address: ___ Township/District ___ Street/Village</p> <p>Father's name: _____ Mother's name _____</p> <p>Child's name: _____</p> <p>(1) Registered permanent residence (2) Non-local registered permanent residence for less than one year</p> <p>(3) Non-local registered permanent residence for more than one year <input type="checkbox"/></p> <p>Sex: 1.Male 2.Female <input type="checkbox"/></p> <p>Date of birth:</p> <table border="1" style="margin-left: 20px; border-collapse: collapse;"> <thead> <tr> <th colspan="2">Year</th> <th colspan="2">Month</th> <th colspan="2">Day</th> </tr> </thead> <tbody> <tr> <td style="width: 20px; height: 20px;"></td> </tr> </tbody> </table> <p>Birth weight: _____ g</p> <p>(1) measured (2) estimated <input type="checkbox"/></p> <p>Gestational weeks: _____ weeks</p> <p>Place of birth:</p> <p>(1) provincial/municipal hospital (2) district/county hospital (3) community/township health center (4) village clinic (5) on the way (6) in home <input type="checkbox"/></p> <p>Date of death:</p> <table border="1" style="margin-left: 20px; border-collapse: collapse;"> <thead> <tr> <th colspan="2">Year</th> <th colspan="2">Month</th> <th colspan="2">Day</th> </tr> </thead> <tbody> <tr> <td style="width: 20px; height: 20px;"></td> </tr> </tbody> </table> <p>Age at death: ___ years ___ months ___ days</p> <p>Cause of death:</p> <p>(a) Disease or condition directly leading to death</p> <p>_____</p> | Year |       | Month |     | Day |  |  |  |  |  |  |  | Year |  | Month |  | Day |  |  |  |  |  |  |  | <p>(b) Disease or condition leading to (a) _____</p> <p>(c) Disease or condition leading to (b) _____</p> <p>(d) Disease or condition leading to (c) _____</p> <p>Underlying cause of death _____</p> <p>Classification Code <input type="checkbox"/><input type="checkbox"/></p> <p>ICD-10 code <input type="checkbox"/><input type="checkbox"/><input type="checkbox"/><input type="checkbox"/><input type="checkbox"/></p> <p>Place of death: (1) hospital/clinic (2) on the way (3) in home <input type="checkbox"/></p> <p>Premortality treatment: (1) inpatient treatment (2) outpatient treatment (3) without treatment <input type="checkbox"/></p> <p>Level of hospital: (1) provincial/municipal hospital (2) district/county hospital (3) community/township health center (4) village clinic (5) without treatment <input type="checkbox"/></p> <p>Reason for untreated: (Single Choice)</p> <p>(1) financial hardship (2) traffic inconvenience (3) time limited (4) parents unaware of the serious condition (5) manners and customs (6) others (specify) <input type="checkbox"/></p> <p>Basis for diagnosis: (1) pathological autopsy (2) clinical diagnosis (3) inference <input type="checkbox"/></p> <p>Basis or evidence to infer the causes of death: (Please describe in details, using the blank on the back.)</p> <p>_____</p> <p>_____</p> |
|------------------------------------------------------------------------------------------------------------------------------------------------------------------------------------------------------------------------------------------------------------------------------------------------------------------------------------------------------------------------------------------------------------------------------------------------------------------------------------------------------------------------------------------------------------------------------------------------------------------------------------------------------------------------------------------------------------------------------------------------------------------------------------------------------------------------------------------------------------------------------------------------------------------------------------------------------------------------------------------------------------------------------------------------------------------------------------------------------------------------------------------------------------------------------------------------------------------------------------------------------------------------------------------------------------------------------------------------------------------------------------------------------------------------------------------------------------------------------------------------------------------------------------------------------------------------------------------------------------------------------------------------------------------------------------------------------------------------------------------------------------------------------------------------------------------------------------------------------------------------------------------------------------------------------------------------------------------------------------------------------------------------------------------------------------------------------------------------------------------------------------------------------------------------|------|-------|-------|-----|-----|--|--|--|--|--|--|--|------|--|-------|--|-----|--|--|--|--|--|--|--|---------------------------------------------------------------------------------------------------------------------------------------------------------------------------------------------------------------------------------------------------------------------------------------------------------------------------------------------------------------------------------------------------------------------------------------------------------------------------------------------------------------------------------------------------------------------------------------------------------------------------------------------------------------------------------------------------------------------------------------------------------------------------------------------------------------------------------------------------------------------------------------------------------------------------------------------------------------------------------------------------------------------------------------------------------------------------------------------------------------------------------------------------------------------------------------------------------------------------------------------------------------------------------------------------------------------------------------------------------------------|
| Year                                                                                                                                                                                                                                                                                                                                                                                                                                                                                                                                                                                                                                                                                                                                                                                                                                                                                                                                                                                                                                                                                                                                                                                                                                                                                                                                                                                                                                                                                                                                                                                                                                                                                                                                                                                                                                                                                                                                                                                                                                                                                                                                                                   |      | Month |       | Day |     |  |  |  |  |  |  |  |      |  |       |  |     |  |  |  |  |  |  |  |                                                                                                                                                                                                                                                                                                                                                                                                                                                                                                                                                                                                                                                                                                                                                                                                                                                                                                                                                                                                                                                                                                                                                                                                                                                                                                                                                                     |
|                                                                                                                                                                                                                                                                                                                                                                                                                                                                                                                                                                                                                                                                                                                                                                                                                                                                                                                                                                                                                                                                                                                                                                                                                                                                                                                                                                                                                                                                                                                                                                                                                                                                                                                                                                                                                                                                                                                                                                                                                                                                                                                                                                        |      |       |       |     |     |  |  |  |  |  |  |  |      |  |       |  |     |  |  |  |  |  |  |  |                                                                                                                                                                                                                                                                                                                                                                                                                                                                                                                                                                                                                                                                                                                                                                                                                                                                                                                                                                                                                                                                                                                                                                                                                                                                                                                                                                     |
| Year                                                                                                                                                                                                                                                                                                                                                                                                                                                                                                                                                                                                                                                                                                                                                                                                                                                                                                                                                                                                                                                                                                                                                                                                                                                                                                                                                                                                                                                                                                                                                                                                                                                                                                                                                                                                                                                                                                                                                                                                                                                                                                                                                                   |      | Month |       | Day |     |  |  |  |  |  |  |  |      |  |       |  |     |  |  |  |  |  |  |  |                                                                                                                                                                                                                                                                                                                                                                                                                                                                                                                                                                                                                                                                                                                                                                                                                                                                                                                                                                                                                                                                                                                                                                                                                                                                                                                                                                     |
|                                                                                                                                                                                                                                                                                                                                                                                                                                                                                                                                                                                                                                                                                                                                                                                                                                                                                                                                                                                                                                                                                                                                                                                                                                                                                                                                                                                                                                                                                                                                                                                                                                                                                                                                                                                                                                                                                                                                                                                                                                                                                                                                                                        |      |       |       |     |     |  |  |  |  |  |  |  |      |  |       |  |     |  |  |  |  |  |  |  |                                                                                                                                                                                                                                                                                                                                                                                                                                                                                                                                                                                                                                                                                                                                                                                                                                                                                                                                                                                                                                                                                                                                                                                                                                                                                                                                                                     |

Report unit \_\_\_\_\_

Name of reporter \_\_\_\_\_

Date of report \_\_\_\_\_

### **Classification Codes for causes of death**

|    |                                          |    |                                               |
|----|------------------------------------------|----|-----------------------------------------------|
| 01 | dysentery                                | 19 | birth asphyxia                                |
| 02 | sepsis                                   | 20 | tetanus of newborn                            |
| 03 | measles                                  | 21 | scleredema of newborn                         |
| 04 | tuberculosis                             | 22 | intracranial hemorrhage                       |
| 05 | other infectious and parasitic diseases  | 23 | other diseases of newborn                     |
| 06 | leukemia                                 | 24 | drowning                                      |
| 07 | other neoplasms                          | 25 | traffic accident                              |
| 08 | meningitis                               | 26 | accidental suffocation                        |
| 09 | other diseases of the nervous system     | 27 | accidental poisoning                          |
| 10 | pneumonia                                | 28 | accidental falls                              |
| 11 | other diseases of the respiratory system | 29 | other accidental injuries                     |
| 12 | diarrhea                                 | 30 | endocrine, nutritional and metabolic diseases |
| 13 | other diseases of the digestive system   | 31 | diseases of blood and blood-forming organs    |
| 14 | congenital heart diseases                | 32 | diseases of the circulatory system            |
| 15 | neural tube defects                      | 33 | diseases of the urinary system                |
| 16 | Down's syndrome                          | 34 | other diseases                                |
| 17 | other congenital malformations           | 35 | ill-defined and unknown causes of death       |
| 18 | premature delivery or low birth weight   |    |                                               |

Webappendix 6. The distribution of deaths by cause ascertaining method by age and year (unweighted), MCHSS, China

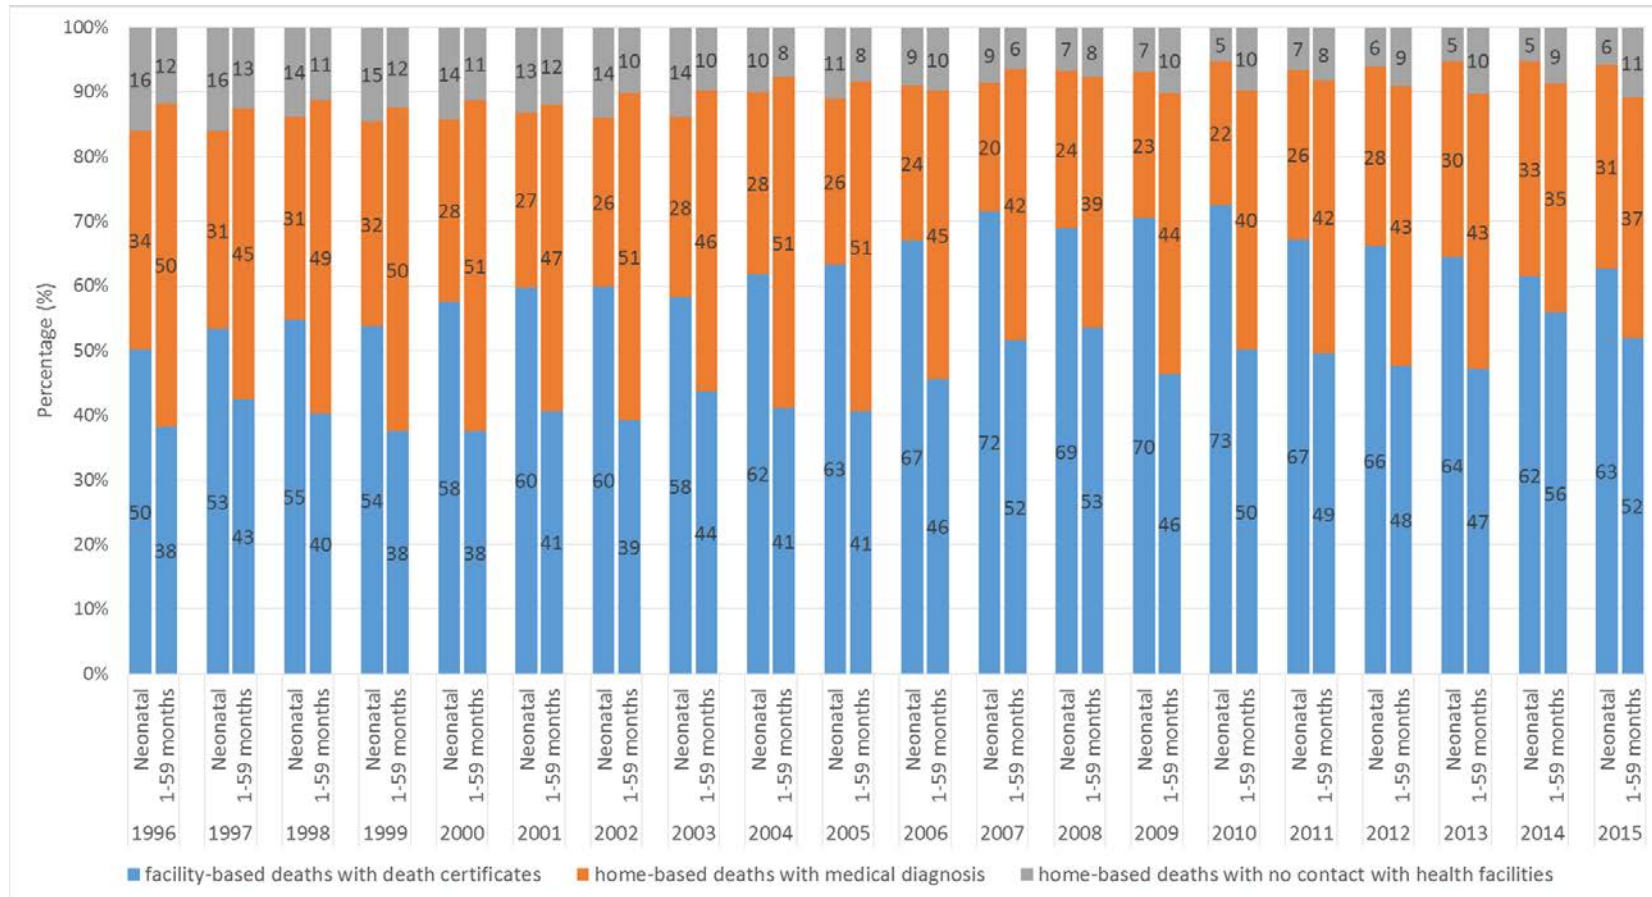

## Webappendix 7. Additional details on quality control of MCHSS

During data triangulation and cross validation across multiple local sources, a number of techniques are used to improve the completeness of births and deaths reporting. These include focus group discussion with village doctors, household visits, medical records review of livebirths and stillbirths, pregnancy and delivery history, Apgar scores for newborns, review of civil registrations records, vaccination records and history, and records from Family Planning Offices, Centers of Disease Control, Public Security Bureaus, Civil Affairs Bureaus, and New Rural Cooperative Medical Scheme Service Offices, etc.<sup>3</sup>

The under-reporting rates are calculated based on the annual quality control study results using the following formula:

$$\text{Underreporting rate} = N_{\text{missed}} / (N_{\text{reported}} + N_{\text{missed}}) \times 100\%$$

where  $N_{\text{missed}}$  is the number of missed livebirths or deaths identified during the annual quality control study, and  $N_{\text{reported}}$  is the number of livebirths or deaths originally reported to MCHSS.

Since 2010, neonatal death audit has been implemented in MCHSS in health departments and maternal and child health facilities at and above the district/county level to validate causes of neonatal deaths and improve neonatal survival. Local health administrative authorities establish a panel of experts that include at least two neonatologists/pediatricians, two obstetricians, health and hospital administrative staff, and MCHSS staff. The expert panel meets with physicians providing care for the deceased neonates, review and adjudicate causes of deaths, and issue review reports for all neonatal deaths occurred in health facilities in MCHSS. All deaths are audited at district/county level every six months, and difficult cases are further audited at the city and provincial level once a year. Experts also collect information on main factors contributing to neonatal deaths, determine whether the deaths are either preventable, preventable under certain conditions, or inevitable, and provide suggestions on interventions to prevent similar neonatal deaths in the future. Annual reports of neonatal death audit are submitted to MCHSS National Office and National Center for Women and Children's Health in China Centers of Disease Control.<sup>3</sup>

Webappendix 8. Causes of deaths categorization and mapping between MCHSS classification, ICD-10, and the Child Health Epidemiology Reference Group (CHERG) classification

| Cause name (CHERG)                                                     | ICD-10 code (CHERG)                                                                                                     | Cause name (MCHSS)                         | ICD-10 (MCHSS)                                         |
|------------------------------------------------------------------------|-------------------------------------------------------------------------------------------------------------------------|--------------------------------------------|--------------------------------------------------------|
| All causes                                                             | A00-Y89                                                                                                                 | All causes                                 | A00-Y89                                                |
| <b>I. Communicable, maternal, neonatal and nutritional conditions*</b> | A00-B99, D50-D53, D64.9, E00- E02, E40-E64, G00, G03-G04, H65-H66, J00-J22, J85, N30, N34, N39.0, N70-N73, O00-P96, U04 |                                            |                                                        |
| HIV/AIDS                                                               | B20-B24                                                                                                                 | 05 Other infectious and parasitic diseases | B20-24                                                 |
| Diarrhea diseases                                                      | A00-A09                                                                                                                 | 01 Dysentery                               | A09.0, A03.9                                           |
|                                                                        |                                                                                                                         | 12 Diarrhea                                | A00-A09                                                |
| Pertussis                                                              | A37                                                                                                                     | 05 Other infectious and parasitic diseases | A37                                                    |
| Tetanus                                                                | A33-A35                                                                                                                 | 20 Tetanus of newborn                      | A33                                                    |
|                                                                        |                                                                                                                         | 05 Other infectious and parasitic diseases | A34-A35                                                |
| Measles                                                                | B05                                                                                                                     | 03 Measles                                 | B05                                                    |
| Meningitis/Encephalitis                                                | A39, A83, A84-A87, G00, G03, G04                                                                                        | 05 Other infectious and parasitic diseases | A39.1-A39.9, A83, A84-A87, G03, G04                    |
|                                                                        |                                                                                                                         | 08 Meningitis                              | A39.0, G00                                             |
| Malaria                                                                | B50-B54, P37.3 , P37.4                                                                                                  | 05 Other infectious and parasitic diseases | B50-B54                                                |
|                                                                        |                                                                                                                         | 23 Other diseases of newborn               | P37.3, P37.4                                           |
| Pneumonia                                                              | H65-H66, J00-J22, J85, P23                                                                                              | 10 Pneumonia                               | J09-10.0, J11.0, J12-18, P23                           |
|                                                                        |                                                                                                                         | 11 Other diseases of respiratory system    | J00-J08, J10-11 (excluding J10.0, J11.0), J19-J22, J85 |
|                                                                        |                                                                                                                         | 34 Other                                   | H65-H66                                                |
| Preterm birth complications                                            | P01.0, P01.1, P07, P22, P25-P28, P61.2, P77                                                                             | 23 Other diseases of newborn               | P01.0, P01.1, P22, P25-28, P61.2, P77                  |
|                                                                        |                                                                                                                         | 18 Premature delivery or low birth weight  | P07                                                    |
| Intrapartum related complications                                      | P01.7-P02.1, P02.4-P02.6, P03, P10-P15, P20-P21, P24, P50, P90-P91                                                      | 19 Birth asphyxia                          | P01.7-P02.1, P02.4-P02.6, P03, P20-P21, P24            |
|                                                                        |                                                                                                                         | 22 Intracranial hemorrhage                 | P10                                                    |
|                                                                        |                                                                                                                         | 23 Other diseases of newborn               | P11-15, P50, P90-P91                                   |

|                                                       |                                                                                                                                                                                                                                                                                      |                                                  |                                                                                        |
|-------------------------------------------------------|--------------------------------------------------------------------------------------------------------------------------------------------------------------------------------------------------------------------------------------------------------------------------------------|--------------------------------------------------|----------------------------------------------------------------------------------------|
|                                                       |                                                                                                                                                                                                                                                                                      | 10 Pneumonia                                     | P24                                                                                    |
| Sepsis and other infectious conditions of the newborn | P35-P39 (excluding P37.3, P37.4)                                                                                                                                                                                                                                                     | 23 Other diseases of newborn                     | P35-P39 (excluding P37.3, P37.4)                                                       |
| Other Group I                                         | Remainder(A10-A36, A38, A40-A82, A88-A99, B00-B04, B06-B19, B25-B49, B55-B99, D50-D53, D64.9, E00-E02, E40-E64, J00-J22, N30, N34, N39.0, N70-N73, O00-O99, P01.2-P01.6, P02.2-P02.3, P02.7-P02.9, P04-P06, P08-P09, P16-P19, P29-P34, P40-P49, P51-P61.1, P61.3-P76, P78-P96, U04 ) | 02 Sepsis                                        | P36                                                                                    |
|                                                       |                                                                                                                                                                                                                                                                                      | 02 Sepsis                                        | A40-A41                                                                                |
|                                                       |                                                                                                                                                                                                                                                                                      | 04 Tuberculosis                                  | A15-19, B90                                                                            |
|                                                       |                                                                                                                                                                                                                                                                                      | 05 Other infectious and parasitic diseases       | A20-A32, A36-A38, A42-A82, A88-A99, B00-B04, B06-B19, B25-B49, B55-B99 (excluding B90) |
|                                                       |                                                                                                                                                                                                                                                                                      | 31 Diseases of blood and blood-forming organs    | D50-D53,D64.9                                                                          |
|                                                       |                                                                                                                                                                                                                                                                                      | 30 Endocrine, nutritional and metabolic diseases | E00-E02, E40-E64                                                                       |
|                                                       |                                                                                                                                                                                                                                                                                      | 10 Pneumonia                                     | J84.9                                                                                  |
|                                                       |                                                                                                                                                                                                                                                                                      | 33 Diseases of the urinary system                | N30, N34, N39.0                                                                        |
|                                                       |                                                                                                                                                                                                                                                                                      | 34 Other diseases                                | N70-N73, O00-O99, U04                                                                  |
|                                                       |                                                                                                                                                                                                                                                                                      | 18 Premature delivery or low birth weight        | P05                                                                                    |
|                                                       |                                                                                                                                                                                                                                                                                      | 21 Scleredema of newborn                         | P80.0,P83.0                                                                            |
|                                                       |                                                                                                                                                                                                                                                                                      | 22 Intracranial hemorrhage                       | P52                                                                                    |
|                                                       |                                                                                                                                                                                                                                                                                      | 12 Diarrhea                                      | P78.3                                                                                  |
|                                                       | P01.2-P01.6, P02.2-P02.3, P02.7-P02.9, P04, P06, P08-P09, P16-P19, P29-P34, P40-P49, P51, P53-P61.1, P61.3-P76, P78-P96 (excluding P78.3, P80.0 and P83.0)                                                                                                                           |                                                  |                                                                                        |
| 23 Other diseases of newborn                          |                                                                                                                                                                                                                                                                                      |                                                  |                                                                                        |
| II. Non-communicable diseases                         | C00-C97, D00-D48, D55-D64 (excluding D 64.9) , D65-D89, E03- E34, E65-E88, F01-F99, G06- G98, H00-H61, H68-H93, I00- I99, J30-J84, J86-J98, K00-K92, L00-L98, M00-M99, N00-N28, N31-N32, N35-N64 (excluding N39.0) , N75-N98, Q00-Q99                                                |                                                  |                                                                                        |

|                              |                                                                                                                                                                                                                                           |                                                  |                                                     |
|------------------------------|-------------------------------------------------------------------------------------------------------------------------------------------------------------------------------------------------------------------------------------------|--------------------------------------------------|-----------------------------------------------------|
| Congenital abnormalities     | Q00-Q99                                                                                                                                                                                                                                   | 14 Congenital heart disease                      | Q20-24                                              |
|                              |                                                                                                                                                                                                                                           | 15 Neural tube defects                           | Q00-01,Q05                                          |
|                              |                                                                                                                                                                                                                                           | 16 Down's syndrome                               | Q90                                                 |
|                              |                                                                                                                                                                                                                                           | 17 Other congenital malformations                | Q02-04, Q06-18, Q25-89,Q91-99                       |
| Other Group II               | Remainder (C00-C97, D00-D48, D55-D64 (excluding D 64.9) , D65-D89, E03- E34, E65-E88, F01-F99, G06- G98, H00-H61, H68-H93, I00- I99, J30-J84, J86-J98, K00-K92, L00-L98, M00-M99, N00-N28, N31-N32, N35-N64 (excluding N39.0) , N75-N98,) | 06 Leukemia                                      | C91-95                                              |
|                              |                                                                                                                                                                                                                                           | 07 Other neoplasms                               | C00-D48 (excluding C91-95)                          |
|                              |                                                                                                                                                                                                                                           | 31 Diseases of blood and blood-forming organs    | D55-D89 (excluding D64.9)                           |
|                              |                                                                                                                                                                                                                                           | 30 Endocrine, nutritional and metabolic diseases | E00-E34, E65-E88                                    |
|                              |                                                                                                                                                                                                                                           | 34 Other diseases                                | F01-F99,H00-H61, H68-H93 , L00-L98, M00-M99         |
|                              |                                                                                                                                                                                                                                           | 09 Other diseases of the nervous system          | G06-G98                                             |
|                              |                                                                                                                                                                                                                                           | 11 Other respiratory diseases                    | J30-J84, J86-J98                                    |
|                              |                                                                                                                                                                                                                                           | 12 Diarrhea                                      | K50-52, K58.0, K59.1                                |
|                              |                                                                                                                                                                                                                                           | 13 Other diseases of the digestive system        | K00-93 (excluding K50-52, K58.0, K59.1)             |
|                              |                                                                                                                                                                                                                                           | 33 Diseases of the urinary system                | N00-N28, N31-N32, N35-N64 (excludingN38.0), N75-N98 |
|                              |                                                                                                                                                                                                                                           | 32 Diseases of the circulatory system            | I00- I99                                            |
|                              |                                                                                                                                                                                                                                           | III. Injuries                                    | V01-Y89                                             |
| 25 Traffic accident          | V01-V99                                                                                                                                                                                                                                   |                                                  |                                                     |
| 26 Accidental suffocation    | W75-W84                                                                                                                                                                                                                                   |                                                  |                                                     |
| 27 Accidental poisoning      | X40-X49                                                                                                                                                                                                                                   |                                                  |                                                     |
| 28 Accidental falls          | W00-W19                                                                                                                                                                                                                                   |                                                  |                                                     |
| 29 Other accidental injuries | V01-Y98, (excluding W00-19, W65-84, V01-99, X40-X49)                                                                                                                                                                                      |                                                  |                                                     |

Webappendix 9. Sampling probability (%) by region-and-residency strata in MCHSS

| <b>Region</b> | <b>Residency</b> | <b>1996</b> | <b>2000</b> | <b>2010</b> |
|---------------|------------------|-------------|-------------|-------------|
| East          | Urban            | 4.6         | 3.8         | 5.4         |
| East          | Rural            | 0.6         | 0.4         | 1.9         |
| Central       | Urban            | 2.7         | 2.4         | 3.1         |
| Central       | Rural            | 0.4         | 0.4         | 2.1         |
| West          | Urban            | 5.3         | 4.8         | 6.6         |
| West          | Rural            | 0.7         | 0.9         | 4.2         |



Webappendix 10. GATHER checklist

| Item                                                                                           | Checklist item*                                      | Section(s) or sources providing information |
|------------------------------------------------------------------------------------------------|------------------------------------------------------|---------------------------------------------|
| Objectives and funding                                                                         |                                                      |                                             |
| 1                                                                                              | Estimated indicator and population                   | Methods                                     |
| 2                                                                                              | Funding sources                                      | Funding section of summary                  |
| Data Inputs                                                                                    |                                                      |                                             |
| For all data inputs from multiple sources that are synthesized as part of the study:           |                                                      |                                             |
| 3                                                                                              | Data identification                                  | Methods and appendix 1-4                    |
| 4                                                                                              | Inclusion/exclusion criteria                         | Not applicable                              |
| 5                                                                                              | Included data sources and their main characteristics | Methods and appendix 1-4                    |
| 6                                                                                              | Potential important biases of input data             | Discussion and appendix 2-3, 7-9            |
| For data inputs that contribute to the analysis but were not synthesized as part of the study: |                                                      |                                             |
| 7                                                                                              | Source of other data inputs                          | Methods                                     |
| For all data inputs:                                                                           |                                                      |                                             |
| 8                                                                                              | Accessible input data files                          | Open access databases**                     |
| Data analysis                                                                                  |                                                      |                                             |
| 9                                                                                              | Conceptual overview of the data analysis method      | Methods and open access databases**         |
| 10                                                                                             | Description of all steps of the analysis             | Methods and appendix 7-9                    |
| 11                                                                                             | Model selection methods                              | Not applicable                              |
| 12                                                                                             | Model performance and/or sensitivity analysis.       | Not applicable                              |
| 13                                                                                             | Uncertainty estimation methods                       | Methods and discussion                      |
| 14                                                                                             | Statistical code                                     | Open access databases**                     |
| Results and discussion                                                                         |                                                      |                                             |
| 15                                                                                             | Accessible estimates data files                      | Open access databases**                     |
| 16                                                                                             | Uncertainty of the estimates                         | Results and discussion                      |
| 17                                                                                             | Results interpretation in light of existing evidence | Results and discussion                      |
| 18                                                                                             | Limitations of the estimates                         | Discussion                                  |

\*Detailed GATHER statement with explanation and elaboration of the items could be found on [gather - statement.org](http://gather-statement.org)

\*\* Open access databases with input files and analytical code of the study could be accessed on the Maternal and Child Epidemiology Estimates project website: <http://tinyurl.com/Hopkins-MNCH-Chinacod-openacce>

Webappendix 11. Cause specific mortality fractions by age among children under-five years of age in China in 2015

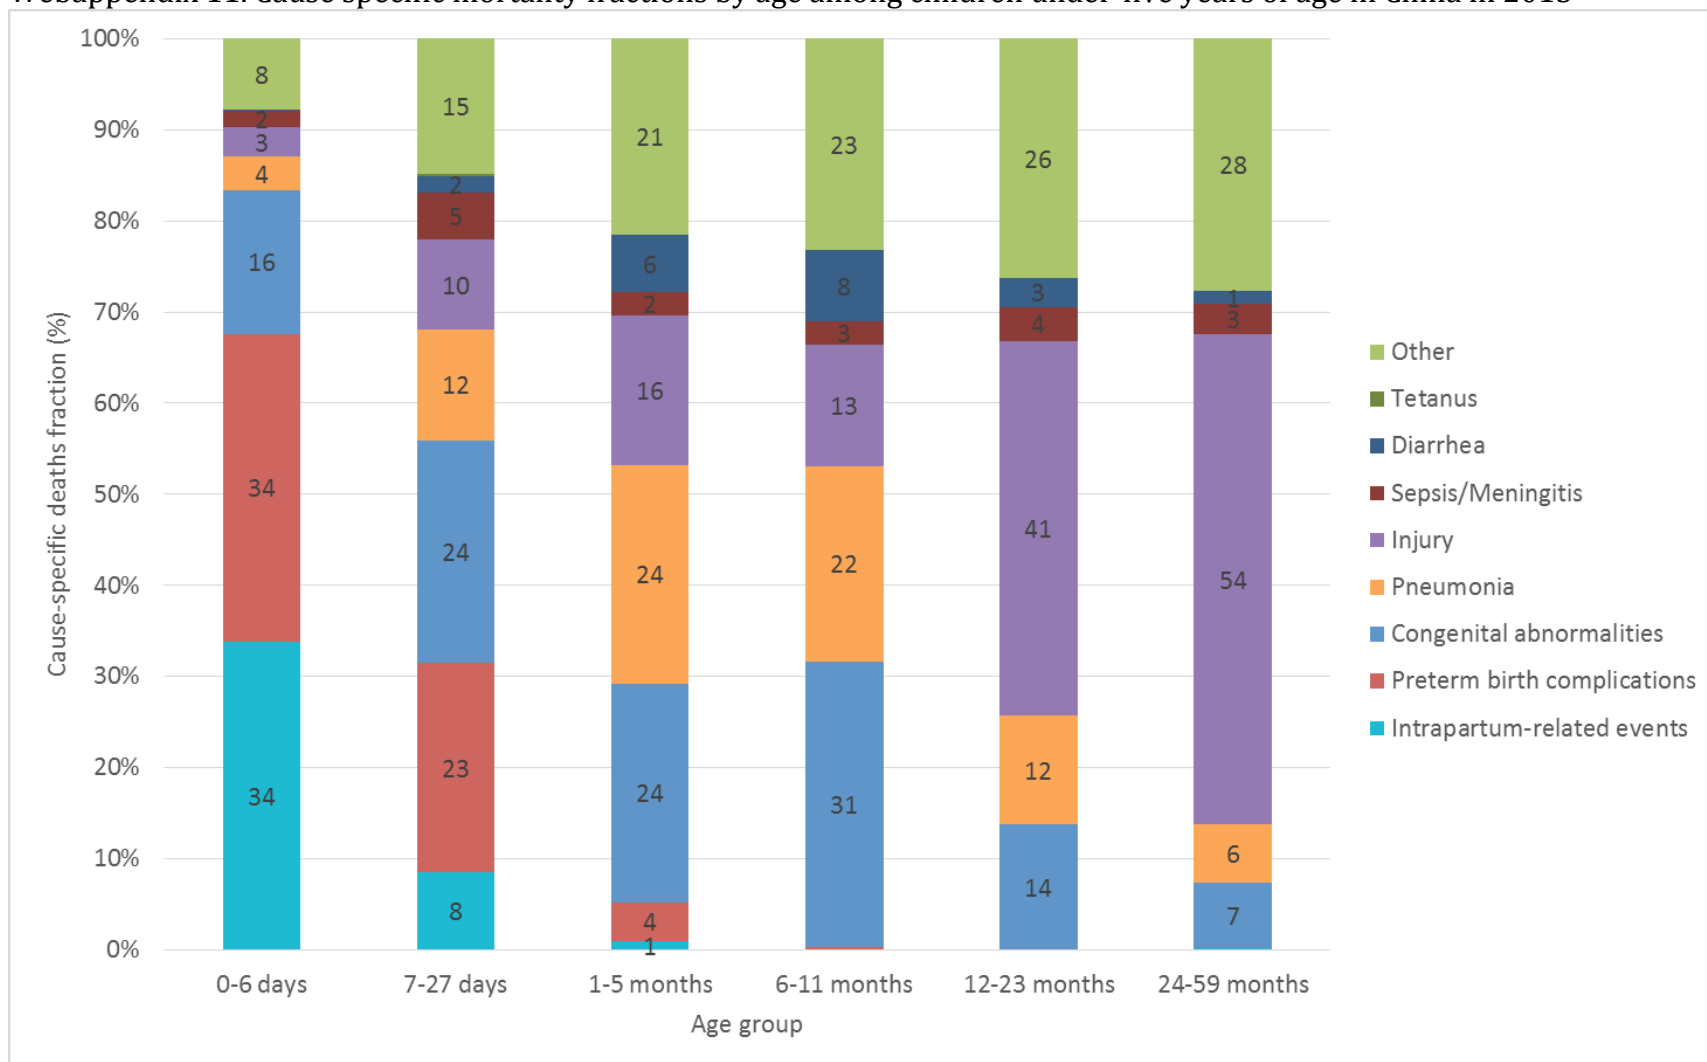

Webappendix 12. Cause specific mortality fractions by residency and region in China in 2015

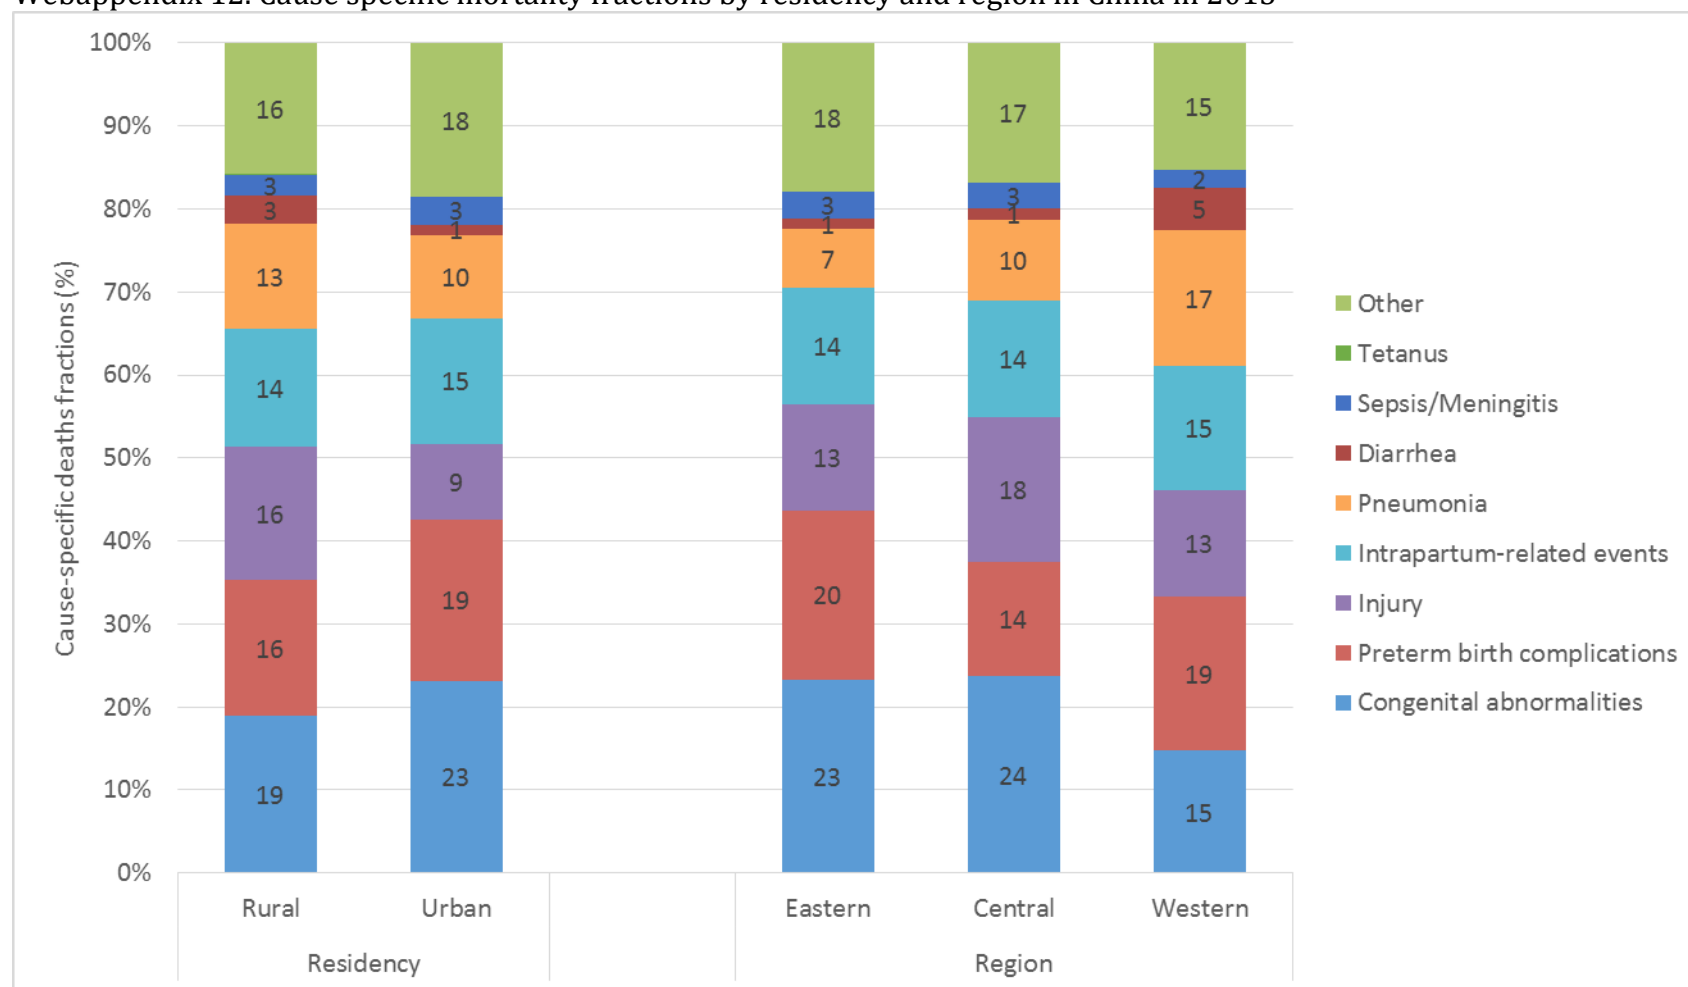

Webappendix 13. Comparison of age-and-cause-specific mortality fractions in 2015 between He et al. and Song et al.

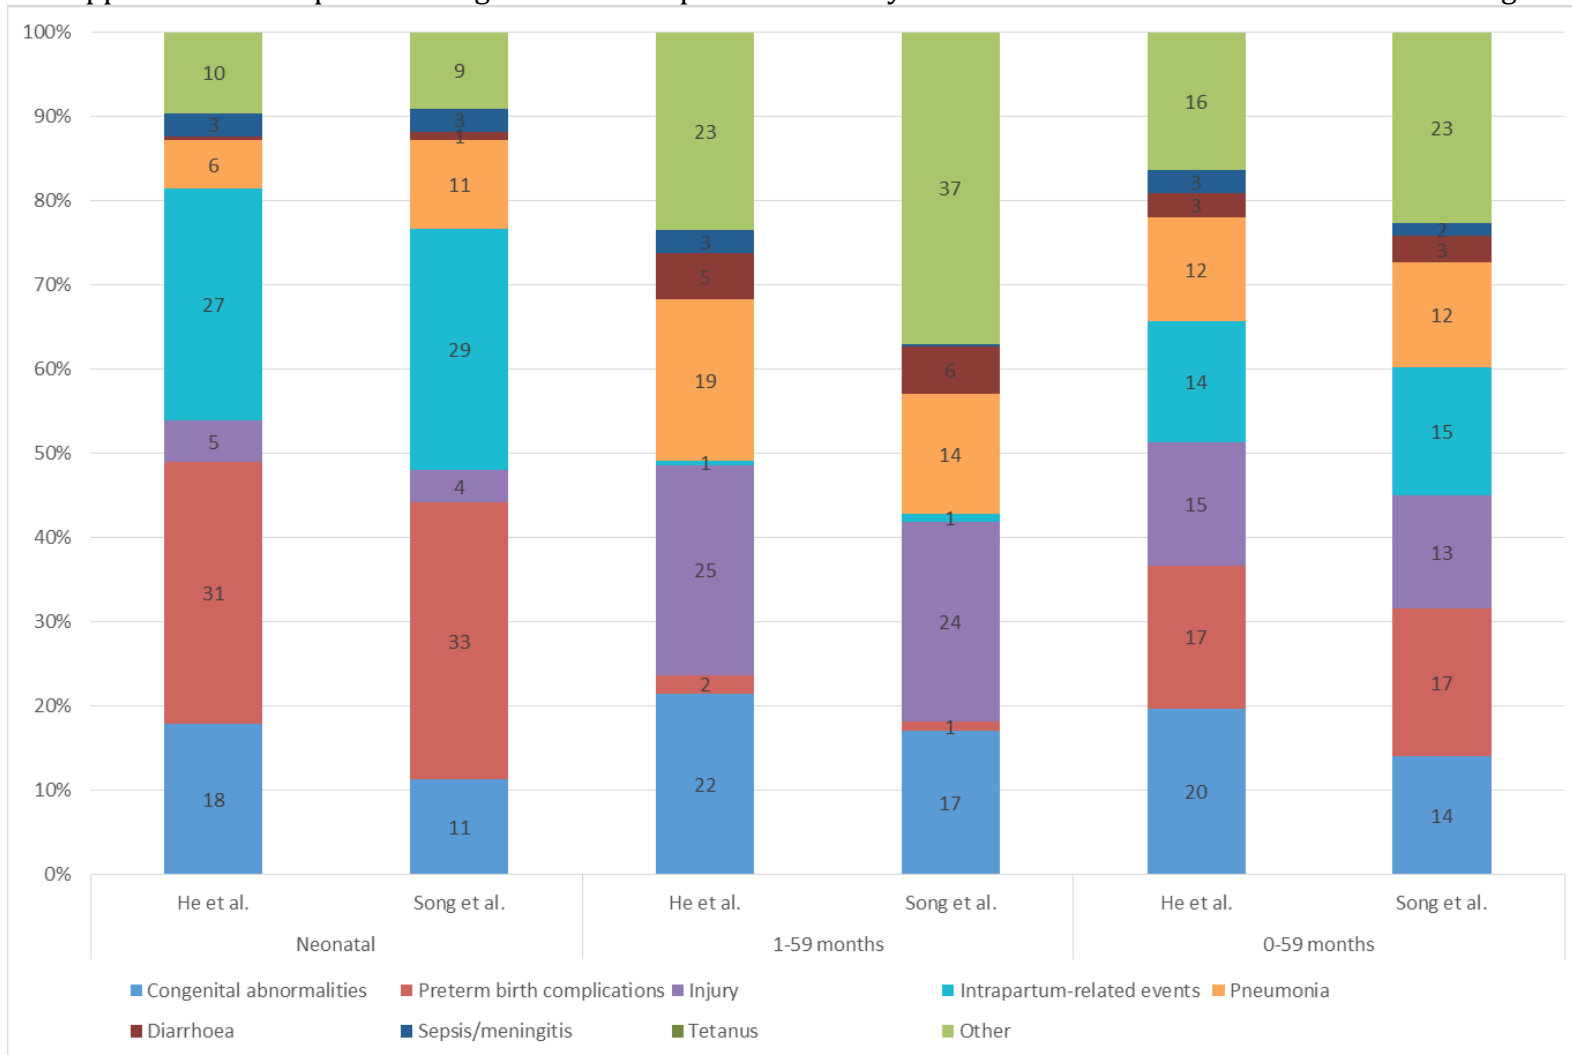

Webappendix 14. Comparison of trends in national U5MR and NMR by estimation sources, China, 1996-2015

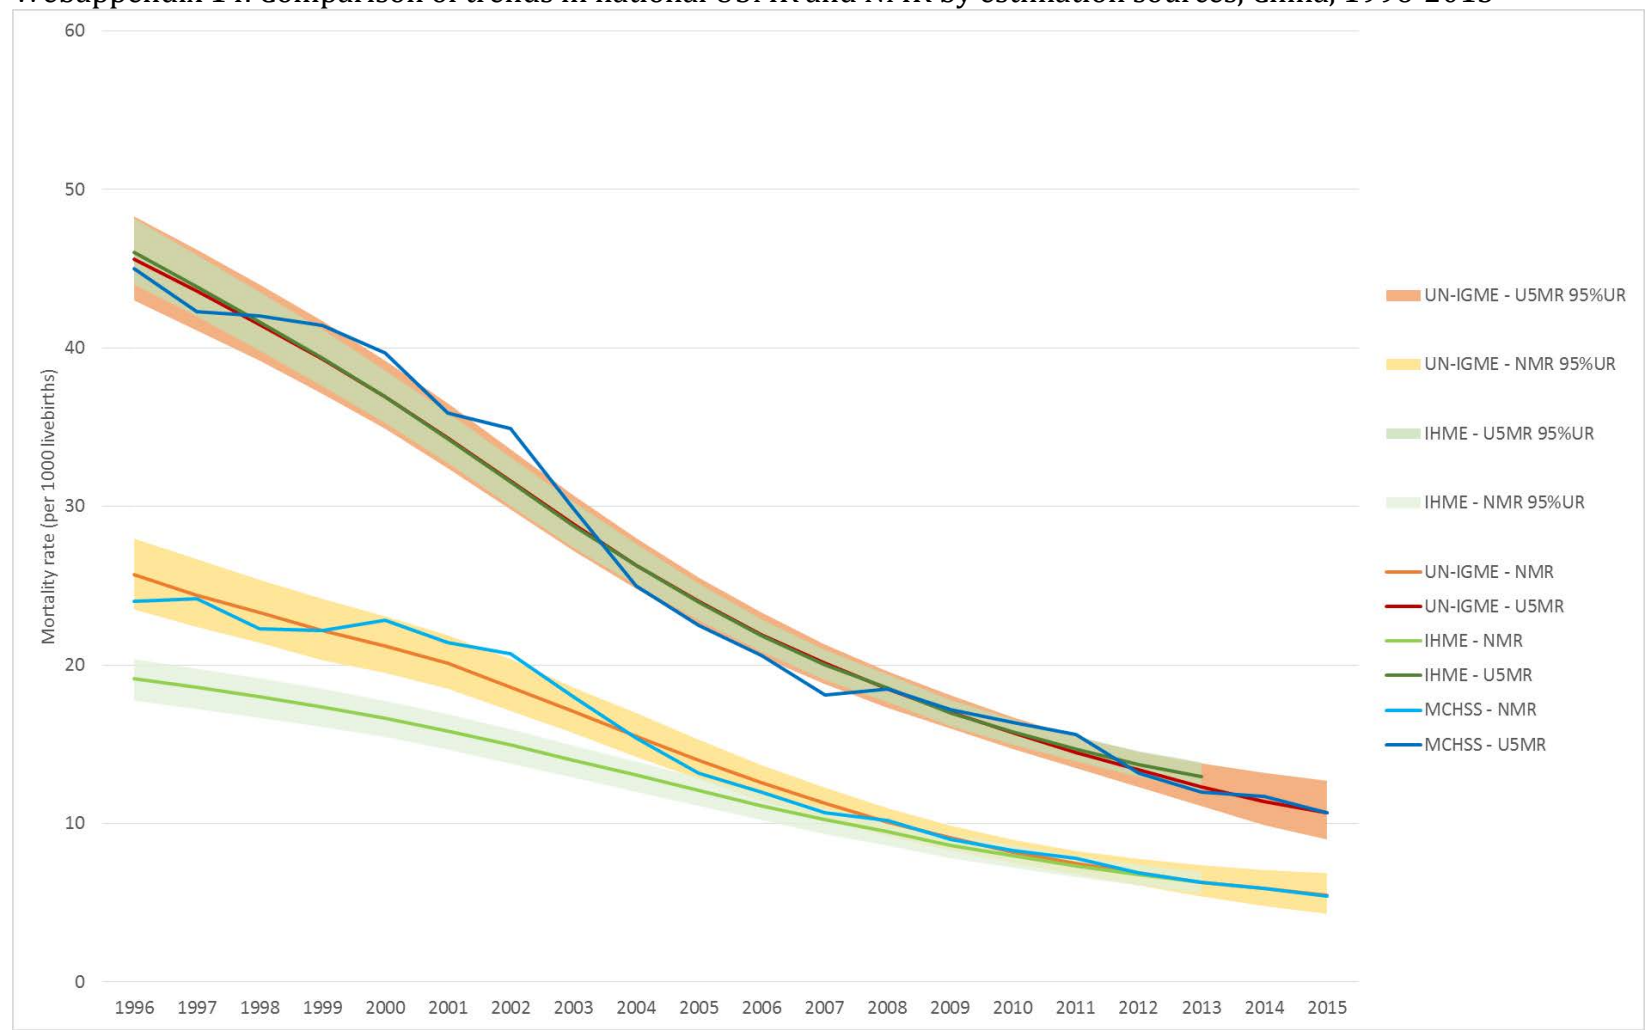

UN-IGME: United Nations' Interagency Group on Child Mortality Estimation<sup>4</sup>; IHME: Institute of Health Metrics and Evaluation<sup>5</sup>

## References

1. Feng S, Shi X. Sampling Survey - Theory, Method and Practice. Shanghai, China: Shanghai Scientific and Technical Publishers; 1996.
2. Wang YP, Miao L, Dai L, et al. Mortality rate for children under 5 years of age in China from 1996 to 2006. *Public Health* 2011; **125**(5): 301-7.
3. National office of China Maternal and Child Health Surveillance System. Handbook of Maternal and Child Health Surveillance System in China, 2013 version: National office of China Maternal and Child Health Surveillance System, 2013.
4. You D, Hug L, Ejdemyr S, et al. Global, regional, and national levels and trends in under-5 mortality between 1990 and 2015, with scenario-based projections to 2030: a systematic analysis by the UN Inter-agency Group for Child Mortality Estimation. *The Lancet* 2015 ; **386**(10010): 2275-86.
5. Wang H, Liddell CA, Coates MM, et al. Global, regional, and national levels of neonatal, infant, and under-5 mortality during 1990–2013: a systematic analysis for the Global Burden of Disease Study 2013. *The Lancet* 2014; **384**(9947): 957-79.
